# Supplementary material
Source: Elsevier journal article supplement (https://www.sciencedirect.com/science/article/pii/S0213911117300596)
Supplement: mmc1 [file S0213911117300596:mmc1.docx]

**Figura 1S. Parámetros del ejemplo.**

X2

X1

Y

ORajustada = 1,986

ORajustada = 1,775

OR = 2,055

**Ecuación 1S. Generación de valores ausentes de X1 según X2 en el patrón de pérdidas MAR.**
